# Supplementary material for: Crystal phase engineering SiC nanosheets for enhancing photocatalytic CO2 reduction
Source: Royal Society of Chemistry journal article supplement (doi:10.1039/d2va00253a), 2022-11-23
Supplement: d2va00253a1.pdf [file d2va00253a1.pdf]

## Supporting information

### Crystal phase engineering SiC nanosheet for enhancing photocatalytic CO<sub>2</sub> reduction

Bing Wang,<sup>‡,a</sup> Xiaotong Shang,<sup>‡,a</sup> Jiangjie Zhang,<sup>a</sup> Jinni Shen,<sup>a</sup> Xuxu Wang,<sup>a</sup> Zizhong Zhang<sup>\*,a,b</sup>

<sup>a</sup>Research Institute of Photocatalysis, State Key Laboratory of Photocatalysis on Energy and Environment, Fuzhou University, Fuzhou, 350002, China.

E-mail: [z.zhang@fzu.edu.cn](mailto:z.zhang@fzu.edu.cn)

<sup>b</sup>Qingyuan Innovation Laboratory, Quanzhou 362801, China

<sup>‡</sup>These authors contributed equally to this work.

**Table S1.** The Raman peak area ratio of SiC-0, SiC-0.2, SiC-P0.3, SiC-0.5, SiC-0.8.

| PVP dosing quantity | 0 g | 0.2 g  | 0.3 g  | 0.5 g  | 0.8 g  |
|---------------------|-----|--------|--------|--------|--------|
| Ratio*              | 0   | 0.2776 | 0.4674 | 0.3017 | 0.2628 |

\* The ratio of the Raman peak area of the TA characteristic peak for 2H phase to the TO characteristic peak for 3C phase SiC.

**Table S2.** The optical absorption band edge and energy band gap of SiC-0, SiC-0.2, SiC-P0.3, SiC-0.5, SiC-0.8.

| Sample  | Optical absorption band edge / nm | Optical energy band gap / eV |
|---------|-----------------------------------|------------------------------|
| SiC-0   | 507                               | 2.45                         |
| SiC-0.2 | 488                               | 2.54                         |
| SiC-0.3 | 470                               | 2.64                         |
| SiC-0.5 | 481                               | 2.57                         |
| SiC-0.8 | 492                               | 2.52                         |

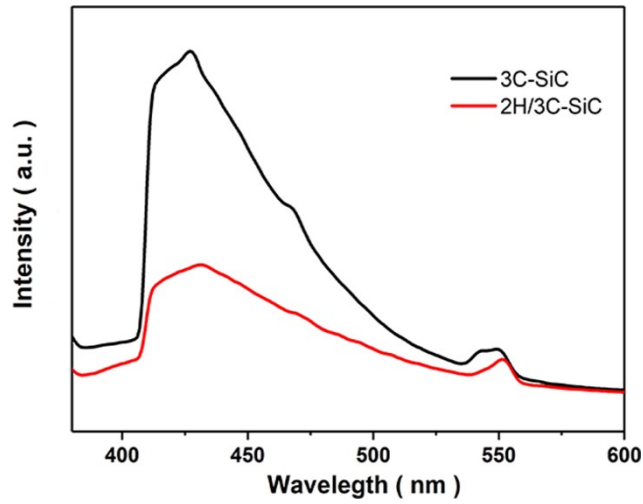

**Figure S1.** The steady-state photoluminescence spectra for 3C SiC and 2H/3C SiC.

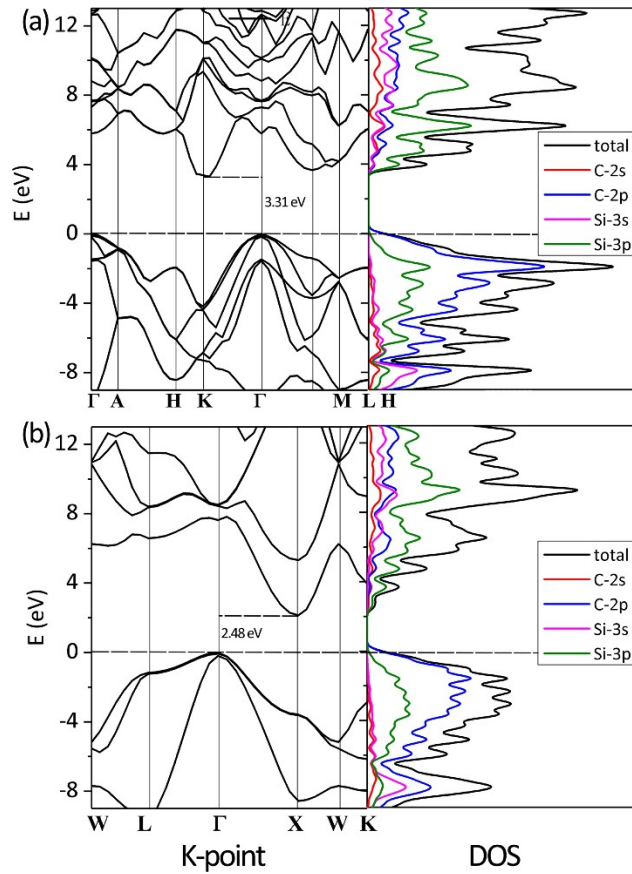

**Figure S2.** The band structure and density of states (DOS) for (a) 2H SiC and (b) 3C SiC.

The theoretical calculation is based on the generalized gradient approximation (GGA)<sup>1</sup> and the PBE<sup>2</sup> exchange correlation function, and the density functional calculation of the local configuration relaxation and electronic structure is performed by CASTEP<sup>3</sup>. The  $2s^22p^2$  of C and the  $3s^23p^2$  of Si

are the corresponding valence electrons. Since conventional DFT methods often underestimate the energy gap, the shielded exchange hybrid density functional (HSE06) method<sup>4</sup> was used to correct the energy gap of PBE. The cutoff energy of the plane wave basis set is 500 eV. A suitable Monkhorst-Pack K-point grid was employed to keep the enthalpy convergence up to  $10^{-6}$  eV. During configuration optimization, K-point grids of  $5 \times 5 \times 5$  and  $7 \times 7 \times 2$  were used for the 3C and 2H phases, respectively, and all atoms were allowed to relax until the atomic forces were less than  $0.02$  eV/Å.

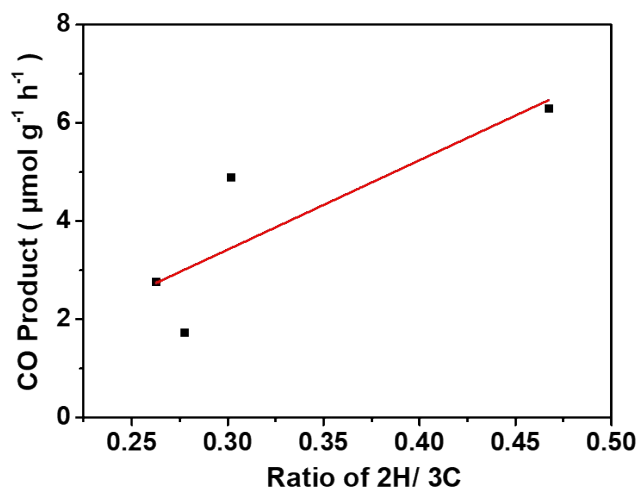

**Figure S3.** CO product on the SiC samples with different ratio of 2H and 3C.

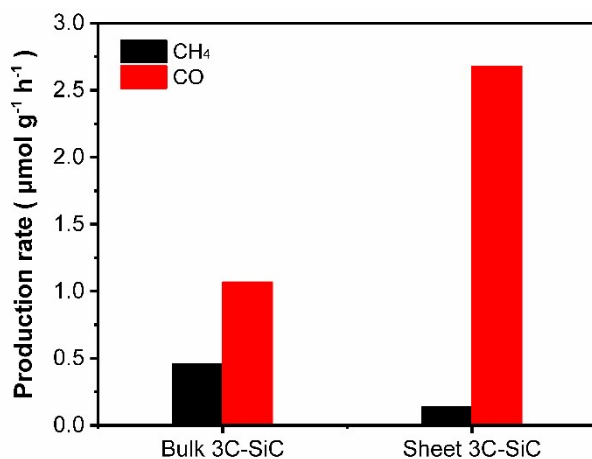

**Figure S4.** CH<sub>4</sub> and CO production rate on the bulk 3C-SiC and sheet 3C-SiC samples.

## References

1. J. P. Perdew and Y. Wang, Accurate and simple analytic representation of the electron-gas correlation energy, *Physical review B*, 1992, **45**, 13244.
2. J. P. Perdew, W. Yang, K. Burke, Z. Yang, E. K. U. Gross, M. Scheffler, G. E. Scuseria, T. M. Henderson, I. Y. Zhang and A. Ruzsinszky, Understanding band gaps of solids in generalized Kohn–Sham theory, *Proceedings of the national academy of sciences*, 2017, **114**, 2801-2806.
3. S. J. Clark, M. D. Segall, C. J. Pickard, P. J. Hasnip, M. I. J. Probert, K. Refson and M. C. Payne, First principles methods using CASTEP, *Zeitschrift für kristallographie-crystalline materials*, 2005, **220**, 567-570.
4. J. Heyd, G. E. Scuseria and M. Ernzerhof, Hybrid functionals based on a screened Coulomb potential, *The Journal of chemical physics*, 2003, **118**, 8207-8215.
